# Supplementary figures and images for: Lipoprotein (a), C-reactive protein and some metabolic cardiovascular risk factors in type 2 DM
Source: Springer Nature journal article supplement (doi:10.1186/1758-5996-2-51), 2010-07-27

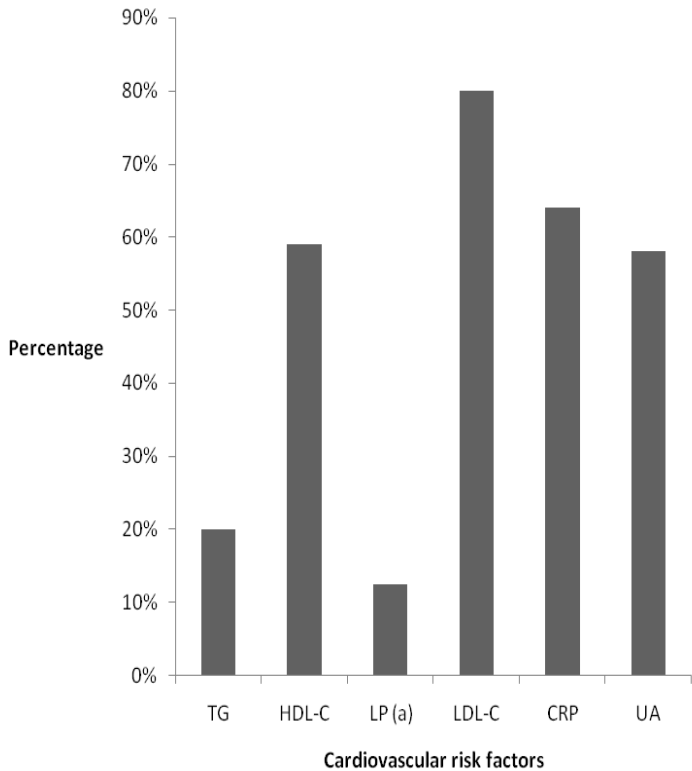

Supplement: 13098_2010_80_MOESM3_ESM.pdf [file 13098_2010_80_MOESM3_ESM.pdf]
